# Supplementary material for: Diagnostic performance of the modified Korean Thyroid Imaging Reporting and Data System for thyroid malignancy according to nodule size: a comparison with five society guidelines
Source: PubMed Central journal article supplement — Ultrasonography. 2020 Dec 9;40(4):474–85. doi: 10.14366/usg.20148 (PMC8446497; doi:10.14366/usg.20148), 2020-12-09
Supplement: usg-20148-supple1.pdf [file usg-20148-supple1.pdf]

**Supplementary Table 1. Definitions of major ultrasound descriptors used in the major risk stratification systems and this study**

| Ultrasound Lexicon/Descriptor                        | Modified K-TIRADS                                                   | AACE/ACE/AME                                                              | ACR TI-RADS                                                                                                   | ATA                                                              | EU-TIRADS                                                                            | K-TIRADS                                                            | This study                                                                                         |
|------------------------------------------------------|---------------------------------------------------------------------|---------------------------------------------------------------------------|---------------------------------------------------------------------------------------------------------------|------------------------------------------------------------------|--------------------------------------------------------------------------------------|---------------------------------------------------------------------|----------------------------------------------------------------------------------------------------|
| <b>Composition</b>                                   |                                                                     |                                                                           |                                                                                                               |                                                                  |                                                                                      |                                                                     |                                                                                                    |
| Solid                                                | Solid with no obvious cystic component                              | Solid with no obvious cystic component <sup>a)</sup>                      | Solid or almost completely solid                                                                              | Solid with no obvious cystic component <sup>a)</sup>             | Solid with <10% of cystic portion                                                    | Solid with no obvious cystic component                              | Same definition (solid with no obvious cystic component)                                           |
| Spongiform <sup>b)</sup>                             | Microcystic changes >50% in isoechoic soft-tissue component         | Microcystic changes >50% in isoechoic soft-tissue component <sup>a)</sup> | Composed predominantly (>50%) of small cystic spaces (regardless of echogenicity)                             | Microcystic changes >50% in isoechoic soft-tissue component      | Entirely tiny cystic spaces separated by numerous isoechoic septa                    | Microcystic changes >50% in isoechoic soft-tissue component         | Different definitions for ACR TIRADS and EU-TIRADS                                                 |
| <b>Echogenicity</b>                                  |                                                                     |                                                                           |                                                                                                               |                                                                  |                                                                                      |                                                                     |                                                                                                    |
| Marked hypoechoicity (very hypoechoic)               | Similar echogenicity or hypoechoic relative to anterior neck muscle | Hypoechoic relative to strap muscle                                       | Decreased echogenicity relative to strap muscle                                                               | Not specified                                                    | Hypoechoic relative to strap muscle                                                  | Hypoechoic relative to anterior neck muscle                         | Different definition for modified K-TIRADS                                                         |
| Mixed echogenicity                                   | Predominant echogenicity of the solid component                     | Predominant echogenicity of the solid component <sup>a)</sup>             | Predominant echogenicity of the solid component                                                               | Predominant echogenicity of the solid component <sup>a)</sup>    | Presence of any hypoechoic tissue indicates mildly hypoechoic nodule                 | Predominant echogenicity of the solid component                     | Different definition for EU-TIRADS                                                                 |
| <b>Shape (orientation)</b>                           |                                                                     |                                                                           |                                                                                                               |                                                                  |                                                                                      |                                                                     |                                                                                                    |
| Image plane for evaluation                           | Transverse or longitudinal                                          | Transverse                                                                | Transverse                                                                                                    | Transverse                                                       | Transverse or longitudinal <sup>c)</sup>                                             | Transverse or longitudinal                                          | Different definition by each system                                                                |
| <b>Margin</b>                                        |                                                                     |                                                                           |                                                                                                               |                                                                  |                                                                                      |                                                                     |                                                                                                    |
| Irregular                                            | Spiculated or microlobulated                                        | Spiculated or microlobulated margins                                      | Lobulated or irregular                                                                                        | Irregular (infiltrative, microlobulated)                         | Irregular (spiculated, microlobulated)                                               | Spiculated or microlobulated                                        | Same definition (spiculated or microlobulated)                                                     |
| <b>Echogenic foci</b>                                |                                                                     |                                                                           |                                                                                                               |                                                                  |                                                                                      |                                                                     |                                                                                                    |
| Microcalcification (punctate echogenic foci)         | Echogenic foci of 1 mm or less in the solid component <sup>d)</sup> | Punctate echogenic foci within the solid component <sup>a)</sup>          | Punctate echogenic foci without posterior shadowing in solid components                                       | Punctate echogenic foci within the solid component <sup>a)</sup> | Echogenic foci approximately 1 mm without posterior shadowing in the solid component | Echogenic foci of 1 mm or less in the solid component <sup>d)</sup> | Same definition (punctate [ $\leq 1$ mm] echogenic foci within the solid component <sup>d)</sup> ) |
| Macrocalcification                                   | Echogenic foci >1 mm with posterior acoustic shadowing              | Echogenic foci >1 mm with posterior acoustic shadowing                    | Coarse echogenic foci accompanied by acoustic shadowing                                                       | Echogenic foci >1 mm with posterior acoustic shadowing           | >1-mm coarse and large calcification with posterior acoustic shadowing               | Echogenic foci >1 mm with posterior acoustic shadowing              | Same definition (echogenic foci >1 mm with posterior acoustic shadowing)                           |
| Isolated macrocalcification                          | Entirely calcified nodule without an identified solid component     | Not specified                                                             | Calcifications with strong acoustic shadowing that precludes or limits assessment of internal characteristics | Not specified                                                    | Entirely calcified nodule                                                            | Entirely calcified nodule without an identified solid component     | Same definition (entirely calcified nodule without an identified solid component)                  |
| Intracystic echogenic foci with comet-tail artifacts | Intracystic echogenic foci with comet-tail artifacts                | Mostly cystic (>50%) nodules with reverberating artifacts <sup>a)</sup>   | Large comet-tail artifacts (V-shaped, >1 mm) in cystic component                                              | Not specified                                                    | Echogenic foci with comet like echogenic tails within cystic component               | Intracystic echogenic foci with comet-tail artifacts                | Same definition (comet-tail artifacts regardless of the tail size)                                 |

K-TIRADS, Korean Thyroid Imaging Reporting and Data System; AACE/ACE/AME, American Association of Clinical Endocrinologists/American College of Endocrinology/ Associazione Medici Endocrinologi Medical Guidelines; ACR TI-RADS, American College of Radiology Thyroid Imaging Reporting and Data System; ATA, American Thyroid Association Management Guideline; EU-TIRADS, European Thyroid Imaging Reporting and Data System; US, ultrasonography.

<sup>a)</sup>US descriptors that are not clearly defined by the guideline. <sup>b)</sup>Regardless of other concurrent suspicious US findings except the K-TIRADS, in which a spongiform nodule should not be associated with suspicious US features. <sup>c)</sup>Not clearly specified. <sup>d)</sup>Punctate echogenic foci with or without posterior acoustic shadowing.
