# Supplementary material for: Diagnostic performance of the modified Korean Thyroid Imaging Reporting and Data System for thyroid malignancy according to nodule size: a comparison with five society guidelines
Source: PubMed Central journal article supplement — Ultrasonography. 2020 Dec 9;40(4):474–85. doi: 10.14366/usg.20148 (PMC8446497; doi:10.14366/usg.20148), 2020-12-09
Supplement: usg-20148-supple2.pdf [file usg-20148-supple2.pdf]

**Supplementary Table 2.** Biopsy size thresholds and malignancy risk according to categories in the five risk stratification systems

| Risk stratification system | Benign nodules (n=3,277) | Malignant nodules (n=549) | Total (n=3,826) | Calculated risk of malignancy (%) | Suggested risk of malignancy (%) | Size thresholds for biopsy (cm) |
|----------------------------|--------------------------|---------------------------|-----------------|-----------------------------------|----------------------------------|---------------------------------|
| AAACE/ACE/AME              |                          |                           |                 |                                   |                                  |                                 |
| High-risk                  | 862                      | 417                       | 1,279 (33.4)    | 32.6 [30.0–35.2]                  | 50–90                            | ≥1.0                            |
| Intermediate-risk          | 2,291                    | 121                       | 2,412 (63.0)    | 5.0 [4.1–5.9]                     | 5–15                             | >2.0                            |
| Low-risk                   | 98                       | 2                         | 100 (2.6)       | 2.0 [0.0–4.7]                     | 1                                | Not indicated <sup>a)</sup>     |
| Unclassified <sup>b)</sup> | 26                       | 9                         | 35 (0.9)        | 25.7 [11.2–40.2]                  | –                                | –                               |
| ACR TI-RADS                |                          |                           |                 |                                   |                                  |                                 |
| Highly suspicious          | 273                      | 345                       | 618 (16.2)      | 55.8 [51.9–59.7]                  | >20                              | ≥1.0                            |
| Moderately suspicious      | 1,100                    | 160                       | 1,260 (32.9)    | 12.7 [10.9–14.5]                  | 5–20                             | ≥1.5                            |
| Mildly suspicious          | 904                      | 24                        | 928 (24.3)      | 2.6 [1.6–3.6]                     | 5                                | ≥2.5                            |
| Not suspicious             | 941                      | 20                        | 961 (25.1)      | 2.1 [1.2–3.0]                     | <2                               | Not indicated                   |
| Benign                     | 59                       | 0                         | 59 (1.5)        | 0.0                               | <2                               | Not indicated                   |
| ATA                        |                          |                           |                 |                                   |                                  |                                 |
| High suspicion             | 288                      | 347                       | 635 (16.6)      | 54.6 [50.8–58.5]                  | >70–90                           | ≥1.0                            |
| Intermediate suspicion     | 406                      | 83                        | 489 (12.8)      | 17.0 [13.6–20.3]                  | 10–20                            | ≥1.0                            |
| Low suspicion              | 926                      | 24                        | 950 (24.8)      | 2.5 [1.5–3.5]                     | 5–10                             | ≥1.5                            |
| Very low suspicion         | 1,041                    | 24                        | 1,065 (27.8)    | 2.3 [1.4–3.1]                     | <3                               | Consider FNA at ≥2.0 cm         |
| Benign                     | 16                       | 0                         | 16 (0.4)        | 0.0                               | <1                               | Not indicated                   |
| Unclassified <sup>c)</sup> | 600                      | 71                        | 671 (17.5)      | 10.6 [8.3–12.9]                   | –                                | –                               |
| EU-TIRADS                  |                          |                           |                 |                                   |                                  |                                 |
| High-risk                  | 880                      | 420                       | 1,300 (34.0)    | 32.3 [29.8–34.8]                  | 26–87                            | >1.0                            |
| Intermediate-risk          | 1,051                    | 73                        | 1,124 (29.4)    | 6.5 [5.1–7.9]                     | 6–27                             | >1.5                            |
| Low-risk                   | 1,296                    | 47                        | 1,343 (35.1)    | 3.5 [2.5–4.5]                     | 2–4                              | >2.0                            |
| Benign                     | 24                       | 0                         | 24 (0.6)        | 0.0                               | 0                                | Not indicated <sup>d)</sup>     |
| Unclassified <sup>b)</sup> | 26                       | 9                         | 35 (0.9)        | 25.7 [11.2–40.2]                  | –                                | –                               |
| K-TIRADS                   |                          |                           |                 |                                   |                                  |                                 |
| High suspicion             | 167                      | 325                       | 492 (12.9)      | 66.1 [61.9–70.2]                  | >60                              | ≥1.0                            |
| Intermediate suspicion     | 1,133                    | 176                       | 1,309 (34.2)    | 13.4 [11.6–15.3]                  | 15–50                            | ≥1.0                            |
| Low suspicion              | 1,881                    | 46                        | 1,927 (50.4)    | 2.4 [1.7–3.1]                     | 3–15                             | ≥1.5                            |
| Benign                     | 96                       | 2                         | 98 (2.6)        | 2.0 [0.0–4.8]                     | <3                               | Not indicated <sup>e)</sup>     |

Values in parentheses are percentages; values in square brackets are 95% confidence intervals.

AAACE/ACE/AME, American Association of Clinical Endocrinologists/American College of Endocrinology/Associazione Medici Endocrinologi Medical Guidelines; ACR TI-RADS, American College of Radiology Thyroid Imaging Reporting and Data System; ATA, American Thyroid Association Management Guideline; FNA, fine-needle aspiration; EU-TIRADS, European Thyroid Imaging Reporting and Data System; K-TIRADS, Korean Thyroid Imaging Reporting and Data System.

<sup>a)</sup>Not routinely indicated, but indicated only when >2 cm and increasing in size or associated with a risk history and before thyroid surgery or minimally invasive ablation therapy. <sup>b)</sup>Isolated macrocalcifications (entirely calcified nodule with posterior acoustic shadowing in which any soft-tissue component is not identified due to dense shadowing). <sup>c)</sup>Includes isolated macrocalcifications and isoechoic and hyperechoic nodules with suspicious US features (microcalcification, taller-than-wide shape, and irregular margin). <sup>d)</sup>Unless compressive. <sup>e)</sup>Not routinely indicated, but indicated for therapeutic aspiration of the cystic content and for diagnosis prior to ablation therapy or surgery.
